# Supplementary material for: Regional uncertainty of GOSAT XCO 2 retrievals in China: Quantification and attribution
Source: Copernicus journal article supplement (doi:10.5194/amt-2017-237), 2017-10-10
Supplement: Supplementary file [file amt-2017-237-AC2-supplement.pdf]

## 1 Referee #2

2 Responses to Anonymous Referee #2 on the manuscript of “Regional uncertainty of GOSAT XCO<sub>2</sub> retrievals in China:  
3 Quantification and attribution”

4  
5 Thank you for your suggestions and valuable comments very much. We have fully considered all your comments, and  
6 carried out our revision and improved our manuscript accordingly. The item-by-item response to the specific comments is as  
7 follows (referee’s comments in **red** and our response in **black**).

### 8 Referee #2:

9 **Major points : See the comments from the other reviewer :**

10 **- EMMA should be left out as it is the combined product of all other retrieval products shown**

11  
12 We removed EMMA from the analysis according to you suggestion and the related analysis were updated in the revised  
13 manuscript. Please refer the details to the revised manuscript because of difficulty in presenting it here since the changes  
14 were made across several sections.

15 The new analysis results for four algorithms (ACOS, NIES, OCFP, SRFP) have not changes only Table 5 (new and old  
16 shown as below) have slight changes as EMMA is the median value among multiple algorithms including our discussing  
17 four algorithms.

### 18 New Table 5

19 **The average of the absolute differences (ppm) and standard deviation (ppm) of the target algorithm (in column)**  
20 **matching all other algorithms for each cell. Values in parentheses are the corresponding standard deviations. The**  
21 **differences, which are larger than 1.5 ppm, are highlighted in bold and underlined.**

| Left longitude of cells( °E) | 80                     | 85       | 90       | 95                     | 100      | 105      | 110      | 115      |
|------------------------------|------------------------|----------|----------|------------------------|----------|----------|----------|----------|
| ACOS                         | 1.3(1.1)               | 1.2(1.0) | 1.0(0.7) | 1.4(1.2)               | 1.2(0.9) | 1.0(0.7) | 0.9(0.6) | 0.7(0.5) |
| NIES                         | 1.1(0.7)               | 1.3(0.9) | 1.2(0.9) | <b><u>1.6(1.2)</u></b> | 1.1(0.8) | 1.1(0.8) | 1.1(0.8) | 0.9(0.6) |
| OCFP                         | <b><u>1.5(1.1)</u></b> | 1.4(1.0) | 1.4(1.0) | 1.3(0.9)               | 1.2(0.9) | 0.9(0.6) | 0.8(0.6) | 0.8(0.6) |
| SRFP                         | 1.1(0.9)               | 1.2(1.0) | 1.4(1.1) | 1.2(0.9)               | 1.1(0.8) | 0.9(0.6) | 1.0(0.7) | 0.8(0.5) |

### 22 Old Table 5

| Left longitude of cells( °E) | 80                     | 85                     | 90       | 95                     | 100      | 105      | 110      | 115      |
|------------------------------|------------------------|------------------------|----------|------------------------|----------|----------|----------|----------|
| ACOS                         | 1.5(0.8)               | 1.4(0.7)               | 1.2(0.4) | 1.6(1.0)               | 1.4(0.6) | 1.1(0.4) | 1.1(0.2) | 0.9(0.2) |
| NIES                         | 1.6(0.2)               | 1.8(0.4)               | 1.6(0.4) | <b><u>2.2(0.6)</u></b> | 1.6(0.3) | 1.5(0.3) | 1.5(0.3) | 1.3(0.2) |
| OCFP                         | <b><u>2.2(0.6)</u></b> | <b><u>2.1(0.6)</u></b> | 1.9(0.5) | 1.7(0.2)               | 1.7(0.4) | 1.2(0.1) | 1.1(0.1) | 1.0(0.2) |
| SRFP                         | 1.3(0.5)               | 1.4(0.7)               | 1.6(0.8) | 1.4(0.6)               | 1.3(0.5) | 1.1(0.3) | 1.2(0.4) | 1.0(0.2) |
| EMMA                         | 1.6(0.9)               | 1.6(1.0)               | 1.3(0.6) | 1.3(0.6)               | 1.3(0.6) | 1.1(0.5) | 1.1(0.4) | 1.0(0.4) |

23  
24 **- Shorten the part on the new version of ACOS, or use only the new version data**

25 We shortened the part on the new version of ACOS, and moved part of it to the appendix according to your suggestion.  
26 Please refer the details to the revised manuscript. We use ACOS V3.5 instead of ACOS V7.3, the more recently released  
27 products, in the analysis because we considered that (1) ACOS V3.5 have been being currently used in our studying group;  
28 (2) as described in reference[GES DISC, 2017], which says, *The retrieval algorithm used to create the Build 7 ACOS data*  
29 *product is consistent with that used to create the OCO-2 v7.3 data product. This will allow comparison of the ACOS and*  
30 *OCO-2 data without having to consider algorithm differences*, ACOS V7.3 is not exactly the newer version of ACOS  
31 products.

32

33 **- Provide a more quantitative analysis of the effect of aerosols and albedo on the observed differences between**  
34 **different algorithms**

35 According to your suggestion, we added a quantitative analysis about the effect of aerosols and albedo in the discussion  
36 section in the revised manuscript and presented it here:

37 We discussed the influences of albedo and AOD on XCO<sub>2</sub> retrievals from ACOS, NIES, OCFP and SRFP in further.  
38 Fig. 1 plots the scatters of albedo and AOD with the differences between GEOS-XCO<sub>2</sub> data (created in section 3.1) to XCO<sub>2</sub>  
39 retrievals, hereafter referred to as dmXCO<sub>2</sub>, for ACOS, NIES, OCFP and SRFP. The albedo data obtained from  
40 GLASS02B06 is used for OCFP as there are no albedo data available from its released data product.

41 Fig. 1 shows that dmXCO<sub>2</sub> of both ACOS and NIES demonstrate a slightly decreasing trend with albedo whereas  
42 slightly increasing trend with AOD. The dmXCO<sub>2</sub> of ACOS tend to be larger in 80 °E -90 °E of deserts with high albedo than  
43 that in other regions. The dmXCO<sub>2</sub> of OCFP demonstrate a clear decreasing trend with albedo and AOD comparing to the  
44 other algorithms. The dmXCO<sub>2</sub> of SRFP basically does not show a clearly dependence on either albedo or AOD. We further  
45 investigated the standard deviation of dmXCO<sub>2</sub> by a variation of the bin-to-bin dmXCO<sub>2</sub> with albedo and AOD. dmXCO<sub>2</sub> is  
46 averaged by surface albedo within 0.05 albedo bins and AOD within 0.05 AOD bins, respectively. The standard deviation of  
47 the mean dmXCO<sub>2</sub> in each 0.05 albedo (AOD) bins, i.e. a measure of the bin-to-bin dmXCO<sub>2</sub>, is calculated. It is found that  
48 the dmXCO<sub>2</sub> for the four algorithms change with both albedo and AOD in bin-to-bin. In the whole study area, the standard  
49 deviation in albedo is the largest for OCFP, up to 0.7 ppm, while that is smaller from ACOS, NIES and SRFP, 0.4 ppm、 0.3  
50 ppm and 0.2 ppm, respectively. The standard deviation of dmXCO<sub>2</sub> in AOD is larger for SRFP (0.5 ppm) than those for  
51 ACOS (0.2 ppm), NIES (0.3 ppm) and OCFP (0.4 ppm). Viewing to the deserts (80 °E -90 °E), the standard deviation in  
52 albedo is the largest from NIES ( 1.5 ppm), and the smallest from OCFP (0.2 ppm) while they are 1.0 ppm and 0.5 ppm for  
53 ACOS and SRFP, respectively. The standard deviations in AOD, however, are similar (0.2-0.4 ppm) in this area. As a result,  
54 OCFP tend to be more sensitive to albedo and AOD compared to other algorithms. In the deserts, NIES are the most  
55 sensitive XCO<sub>2</sub> retrievals to surface albedo and OCFP the least.

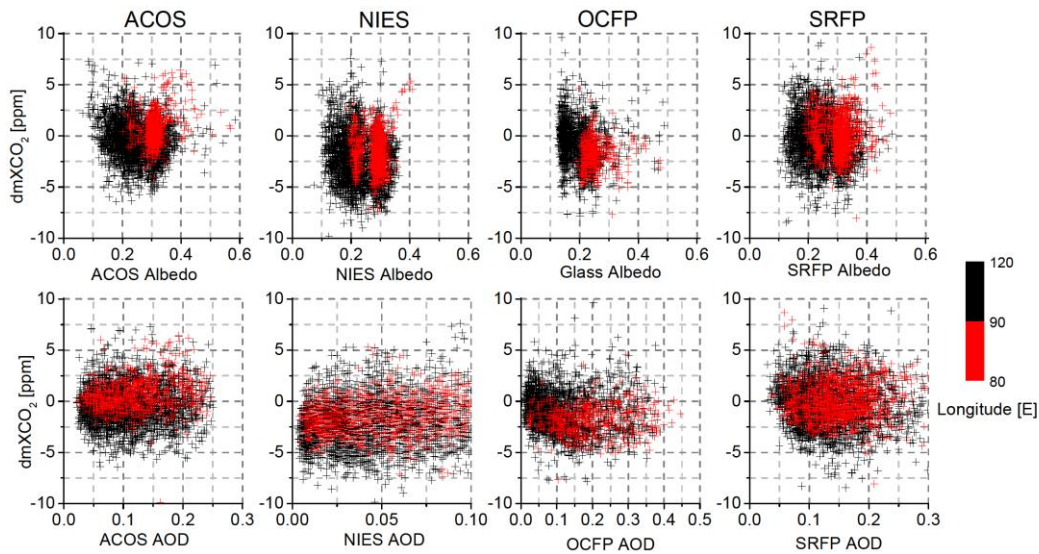

56

57 **Fig. 1: Scatter plots of the differences ( $dmXCO_2$ ) between GEOS- $XCO_2$  to ACOS, NIES, OCFP and SRFP respectively, with**  
 58 **respect to albedo (the upper panels) and AOD (the lower panels). Colored points represent the data from different cells: red-[80 E,**  
 59 **105 E], black-[105 E, 120 E] in the study latitude zone [37 N, 42 N]. Colored solid lines display the corresponding linear**  
 60 **regression trend line for the total points. Albedo and AOD are extracted from data products of the retrieval algorithms except**  
 61 **albedo data in OCFP in which GLASS data are used.**

62 Figure Fig. 2, moreover, demonstrates the influence of albedo and AOD on the standard deviation (STD) of  $XCO_2$  from  
 63 four algorithms at the same footprints (timely in the same day, geometrically located within  $\pm 0.01^\circ$  in space). Averaged  
 64 albedo (the left panels) and AOD (the right panels) of the four algorithms are used whereas the averaged albedo is obtained  
 65 only using three attached albedo in the algorithms except OCFP.

66 The increasing trends of STD with both albedo and AOD can be seen from Fig. 2. The mean STD is 1.3 ppm in the  
 67 western cells (80°E -90°E) where albedo is mostly within 0.25-0.35. This STD is lightly larger than that (1.0ppm) in eastern  
 68 cells (90°E-120E°) where albedo is comparatively smaller (mostly within 0.15-0.25). It is found from the statistics presented  
 69 in Fig. 2 that the correlation coefficients of STD with albedo and that with AOD is almost the same (both are 0.3) for all the  
 70 data. Particular influence from albedo in desert over the western cells can be clearly observed. These results indicate that the  
 71 inconsistency of  $XCO_2$  retrievals from four algorithms tend to be increase with the enlargements of albedo and AOD so as to  
 72 imply that uncertainty of satellite-retrieved  $XCO_2$  should be mostly alerted with the elevations of albedo and AOD.

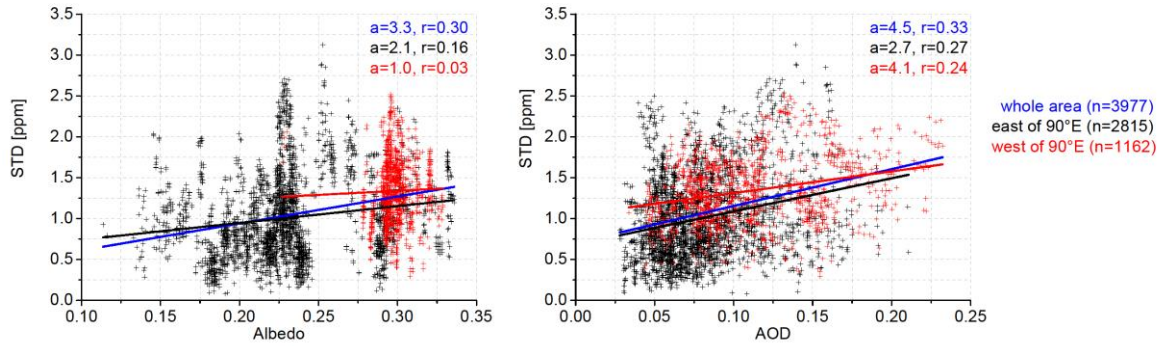

73

74 **Fig. 2: Scatter plots of the standard deviation (STD) of XCO<sub>2</sub> from the four algorithms to albedo (the left panel) and AOD (the**  
 75 **right panel). Colored points represent different cells: red-[80 °E, 105 °E], black-[105 °E, 120 °E] in the latitude zone [37 °N, 42 °N].**  
 76 **Colored solid lines display the corresponding linear regression trend line for the scatter plots with the regression slope (a) and the**  
 77 **correlation coefficient (r) also presented. n is the number of samples. Albedo is the mean surface albedo in 0.75-um band from the**  
 78 **three algorithms including ACOS, NIES and SRFP. AOD is the mean AOD in 0.75-um band from the four algorithms.**

79

80

81

82 **- Provide some clear evidence of performance of GEOS-Chem wrt total column XCO<sub>2</sub>**

83 We added comparisons of GEOS-Chem with 14 TCCON sites. The added descriptions and validation results are shown  
 84 in the revised manuscript and as follows:

85 We compared GEOS-Chem CO<sub>2</sub> simulations from the global model driven by CHRED with daily mean TCCON data  
 86 from 14 TCCON sites (version GGG2014 data version) (Blumenstock et al., 2014; Deutscher et al., 2014; Griffith et al.,  
 87 2014a, 2014b; Hase et al., 2014; Kawakami et al., 2014; Kivi et al., 2014; Morino et al., 2014; Sherlock et al., 2014;  
 88 Sussmann et al., 2014; Warneke et al., 2014; Wennberg et al., 2014a, 2014b, 2014c). All TCCON measurements between 12  
 89 pm and 13:30 pm are used in the comparisons, where GEOS-Chem CO<sub>2</sub> profiles are taken according to the location of  
 90 TCCON stations (latitude and longitude) as well as the observing date and transformed to XCO<sub>2</sub> by convolved with the  
 91 individual averaging kernel in each station as Wunch (2010) suggested. The statistics results are shown in Table 1.

92 **Table 1. Statistics of comparison between GEOS-Chem CO<sub>2</sub> simulations driven by CHRED and TCCON data from January 2010**  
 93 **to February 2013, which includes biases ( $\Delta$ ), the standard deviations ( $\delta$ ), the correlation coefficients (r) and valid days (days) when**  
 94 **TCCON data are available.  $\Delta$ ,  $\delta$  and r are calculated using coincident daily mean data averaged between 12:00 pm and 13:30 pm.**

| ID | Station name | Latitude | Longitude | $\Delta$ [ppm] | $\delta$ [ppm] | r    | days |
|----|--------------|----------|-----------|----------------|----------------|------|------|
| 1  | Sodankyla    | 67.37    | 26.63     | 2.03           | 2.00           | 0.83 | 269  |
| 2  | Bialystok    | 53.23    | 23.02     | 0.49           | 1.84           | 0.87 | 196  |
| 3  | Karlsruhe    | 49.1     | 8.44      | 0.84           | 1.69           | 0.84 | 152  |
| 4  | Orleans      | 47.97    | 2.11      | 0.44           | 1.70           | 0.85 | 223  |
| 5  | Garmisch     | 47.48    | 11.06     | 0.65           | 1.64           | 0.83 | 293  |
| 6  | Park Falls   | 45.94    | -90.27    | 1.17           | 2.14           | 0.75 | 494  |
| 7  | Lamont       | 36.6     | -97.49    | -0.04          | 1.22           | 0.90 | 642  |
| 8  | Tsukuba      | 36.05    | 140.12    | 1.43           | 1.66           | 0.75 | 217  |

|      |            |        |         |                 |                 |      |     |
|------|------------|--------|---------|-----------------|-----------------|------|-----|
| 9    | JPL        | 34.2   | -118.18 | -1.30           | 1.15            | 0.90 | 289 |
| 10   | Saga       | 33.24  | 130.29  | -0.39           | 1.65            | 0.86 | 159 |
| 11   | Izana      | 28.3   | -16.48  | 0.85            | 1.04            | 0.90 | 114 |
| 12   | Darwin     | -12.43 | 130.89  | 0.65            | 0.90            | 0.88 | 447 |
| 13   | Wollongong | -34.41 | 150.88  | 0.53            | 0.83            | 0.94 | 347 |
| 14   | Lauder     | -45.04 | 169.68  | 0.92            | 0.42            | 0.97 | 370 |
| Mean |            |        |         | $0.59 \pm 0.80$ | $1.42 \pm 0.50$ |      |     |

95 The results of Table 1 show that the bias ranges from -1.30 to 2.03 ppm for all TCCON sites with standard deviations of  
96 the difference varying from 0.42 to 2.14 ppm. The mean standard deviation at the TCCON sites, a measure of the achieved  
97 overall precision, from using GEOS-Chem simulations driven by CHRED is  $1.42 \pm 0.50$  ppm which is slightly different  
98 from using GEOS-Chem simulations driven by ODIAC ( $1.41 \pm 0.49$  ppm). Those validated results with TCCON comparing  
99 GEOS-Chem CO<sub>2</sub> simulations driven by CHRED to that by ODIAC indicate that the GEOS-Chem CO<sub>2</sub> simulations driven  
100 by CHRED is more likely not to change the global magnitude of CO<sub>2</sub> concentration but rather to depict fine spatial  
101 distribution of CO<sub>2</sub> concentration in China.

102  
103  
104

105 **Minor : Textual suggestions :**

106

107 **-p.2 line 46 : I think you should leave out TanSat in that particular sentence as that instrument has not yet**  
108 **contributed to a better understanding of...as far as I know.**

109 Yes, TanSat have not produces XCO<sub>2</sub> data available as to its some problems as you know. We removed the description  
110 of TanSat in the revised manuscript.

111

112 **-p.3 line 85-86 : rephrase 'that trend ...to east' because unclear what is meant**

113 Modified to: " there are anthropogenic emissions increasing from west to east." in line 83.

114

115 **-p.9 GLASS albedo is used. For which wavelength is this albedo?**

116 It is broadband albedo product rather than albedo in narrow bands. The following was added: " GLASS02B06 is a daily  
117 land-surface shortwave (300-3000nm) broadband albedo product in temporal resolution of eight days."

118

119 **-table 2. Add to the table caption : All biases > 1 ppm are underlined.**

120 We added it in the caption of table 3, which is the previous table 2. The caption is modified to: "The biases (ppm) and  
121 their standard deviations (ppm) of the four algorithms vs GEOS-Chem in each cell, where the upper line indicates bias (the  
122 corresponding standard deviations in parenthesis) for each algorithm vs GEOS-Chem and the lower line is the available  
123 number of used samples. The biases, larger than 1 ppm, are highlighted in bold and underlined." in the revised manuscript.

124

125 **-Change 'the values in parentheses are the biases and their ...' → 'the values are the biases and -in parentheses-**  
126 **their...'**

127 We revised this incorrect description, which also refers to the caption of table 3, in the revised manuscript. If you have  
128 read the last item, the following five lines can be skipped.

129 The caption is modified to:“The biases (ppm) and standard deviation (ppm) of the four algorithms vs GEOS-Chem in  
130 each cell, where the upper line indicates bias(the standard deviations) for each algorithm vs GEOS-Chem and the lower line  
131 is the number of used samples. The biases, larger than 1 ppm, are highlighted in bold and underlined.” in the revised  
132 manuscript.

133

134 **-Table 3 table caption. What are the underlined values ?**

135 They are differences (ppm) larger than 1.5 ppm between two algorithms (column algorithm minus row algorithm) for  
136 each cell.

137 The caption of Table 4, which is the previous table 3, was modified to: “Differences (ppm) between two algorithms  
138 (column algorithm minus row algorithm) and the standard deviation (ppm) for each cell, where values in parentheses are the  
139 corresponding standard deviations. The differences, larger than 1.5 ppm, are highlighted in bold and underlined.” in the  
140 revised manuscript.

141

142 **p.18 line 350 ('To summarize the quantification...SRFP') : I do not understand this sentence given the data.**

143 Thank you for pointing it out. This sentence has been deleted in the revised manuscript because we are also aware that  
144 this sentence makes the results confusing.

145

146 **-Fig. 8 Figure caption 'and the differences of detrended.... and GEOS-Chem' should that be '... with GOES-Chem' ?**

147 Corrected. Modified to :” The spatial (in the study latitude band) and temporal (in seasons) changing patterns of  
148 detrended XCO<sub>2</sub> from ACOS, NIES, OCFP, SRFP retrievals and GEOS-Chem simulations (left) and the differences of  
149 detrended XCO<sub>2</sub> to GEOS-Chem for ACOS, NIES, OCFP and SRFP.”

150

151 **-p.21 line 423/424 I do not understand the sentence 'No bias was found ...R2=0.77' based on what I see in Table 6.  
152 Also it is not consistent with what is written in line429/430.**

153 It is our incorrect expression. The results that no bias was found in ACOS V7.3 from GEOS-Chem with a standard  
154 deviation of 1.6 ppm and R2=0.77, is for the whole study area. The original Line 429/430 which states, “*It can also be found  
155 from Table 6 that the bias of ACOS V7.3 relative to GEOS-Chem is within 0.3 ppm but above 1.3 ppm, in cells east and west  
156 of 90°E, respectively.*”, is focused on the regional performance.

157 The sentence has been modified to:” No bias was found in ACOS V7.3 from GEOS-Chem with a standard deviation of  
158 1.6 ppm and R2 of 0.77 in the whole study area.” in the appendix.

159

160 **-p. 23, line 462 results above → results described above**

161 Corrected.

162
